# Supplementary material for: Efficient and stable semitransparent perovskite photovoltaics via a Lewis base incorporation
Source: Royal Society of Chemistry journal article supplement (doi:10.1039/d4nr02046d), 2024-01-01
Supplement: d4nr02046d1.pdf [file d4nr02046d1.pdf]

## Supplemental information

### Efficient and stable semitransparent perovskite photovoltaics via a Lewis base incorporation

Jixi Zeng,<sup>a,‡</sup> Xi Fan,<sup>\*a,‡</sup> Jinzhao Wang,<sup>b</sup> Ziqi Zhang,<sup>a</sup> Jiwen Chen,<sup>a</sup> Kwun Nam Hui,<sup>e</sup> Weijie Song<sup>\*a,c,d</sup>

<sup>a</sup>Ningbo Institute of Materials Technology and Engineering, Chinese Academy of Sciences, Ningbo, 315201, P.R. China.

<sup>b</sup>School of Material Science and Engineering, Hubei University, Wuhan 430062, P.R. China.

<sup>c</sup>Center of Materials Science and Optoelectronics Engineering, University of Chinese Academy of Sciences, Beijing 100049, P.R. China.

<sup>d</sup>Research Center for Sensing Materials and Devices, Zhejiang Lab, Hangzhou, Zhejiang 311121, P.R. China.

<sup>e</sup>Joint Key Laboratory of the Ministry of Education, Institute of Applied Physics and Materials Engineering, University of Macau, Avenida da Universidade, Taipa, Macau SAR 999078, P.R. China.

\*Correspondence: fanxi@nimte.ac.cn (X. F.); weijiesong@nimte.ac.cn (W.J. S.)

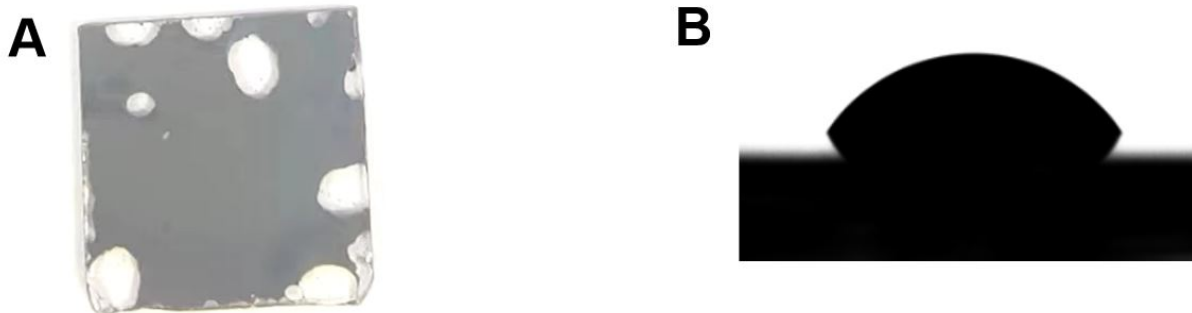

**Figure S1.** (A) An incomplete deposition of the perovskite thin layers on the Lewis base without alkyls (triphenylphosphine, TPP)/MeO-2PACz/ITO/glass. (B) A large contact angle ( $61^\circ$ ) of the perovskite precursor solutions on the triphenylphosphine/MeO-2PACz/ITO/glass. To avoid the issues of the incomplete deposition and the inferior contacts at interfaces, we proposed the component strategy using the Lewis base and PCBM blends.

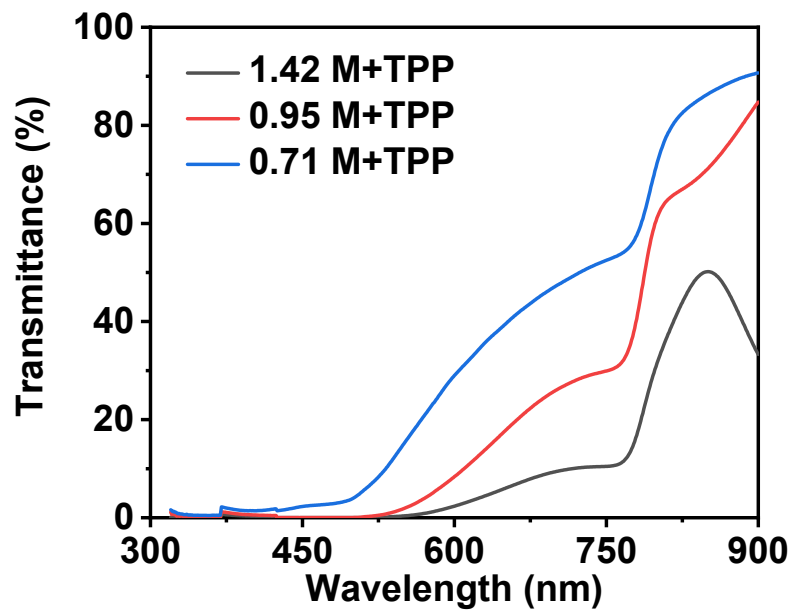

**Figure S2.** Transmittance spectra of the ST-PSCs with AVTs of 4.93%, 14.38% and 25.65%.

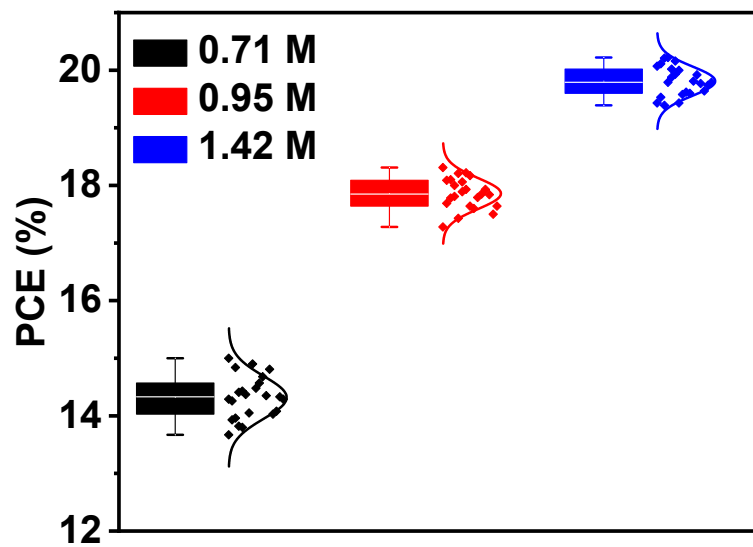

**Figure S3.** Numerical distribution characteristics of PCEs of the optimized ST-PSCs with the Lewis base incorporation.

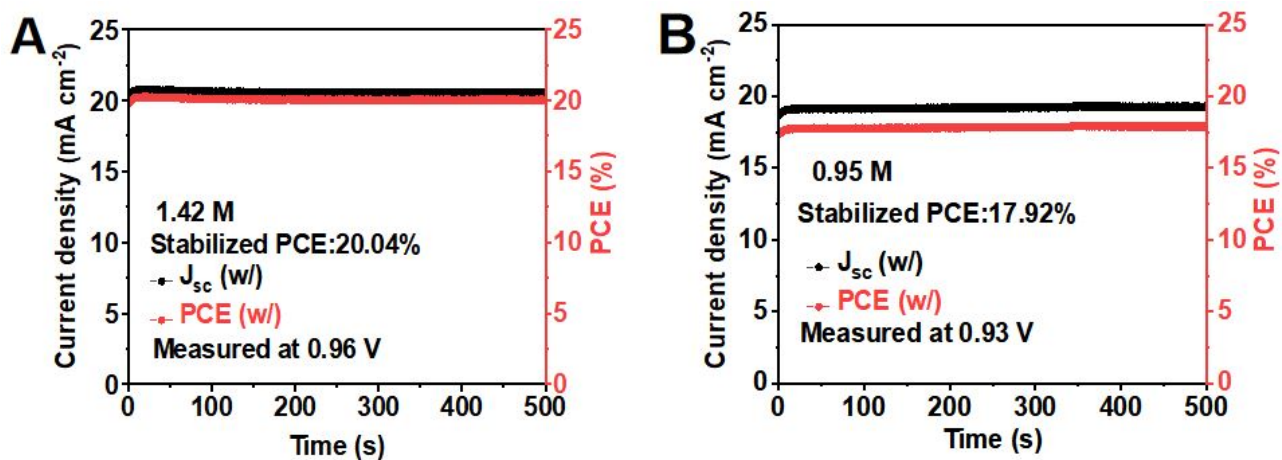

**Figure S4.** (A,B) Steady-state photo-current and power outputs of the ST-PSCs based on the 1.42 M and 0.95 M perovskites with the TPP treatments.

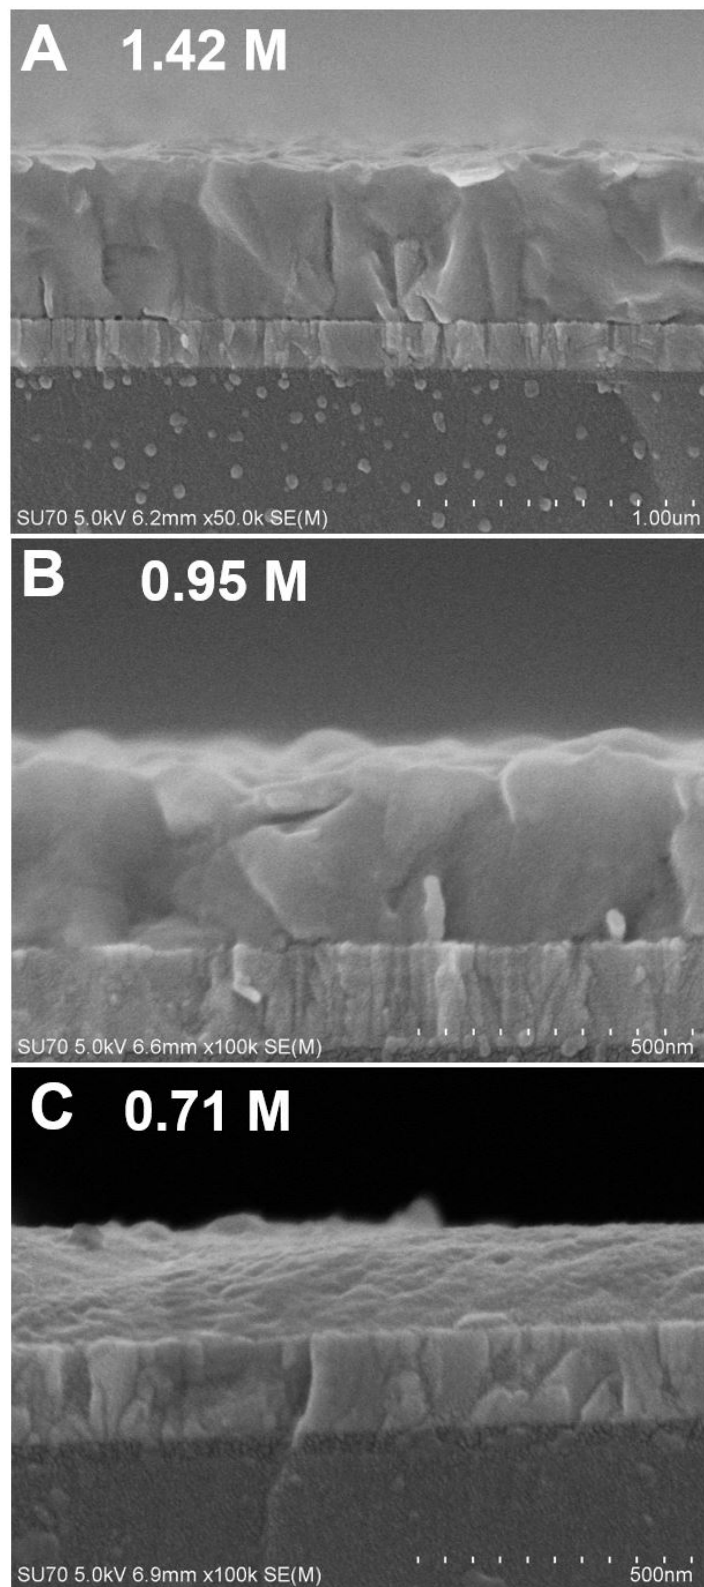

**Figure S5.** Cross-sectional morphology of the perovskite layers. A) 1.42 M, B) 0.95 M, and C) 0.71 M.

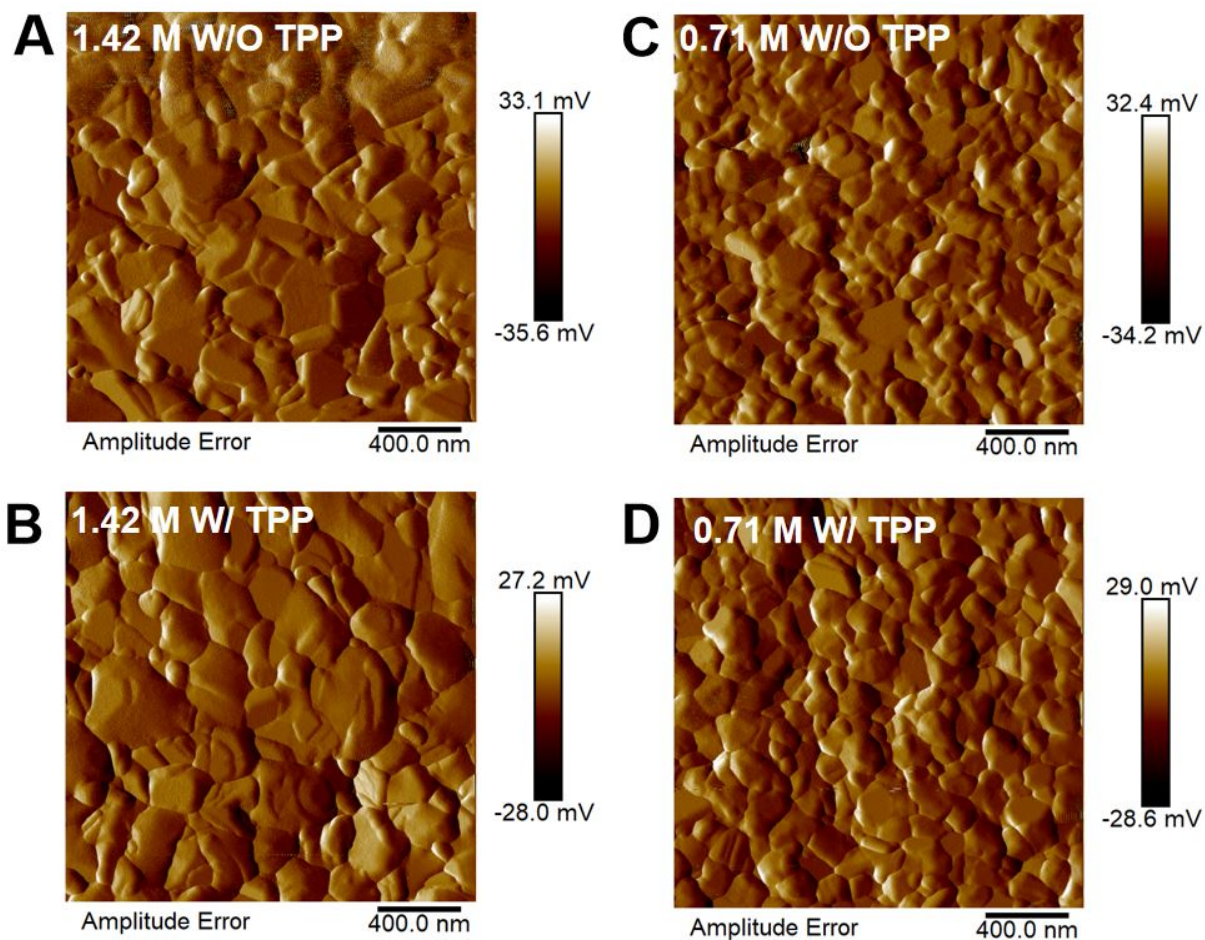

**Figure S6.** Voltage amplitude errors of the 1.42 M (A,B) and 0.71 M (C,D) perovskite thin layers without and with the Lewis base treatments.

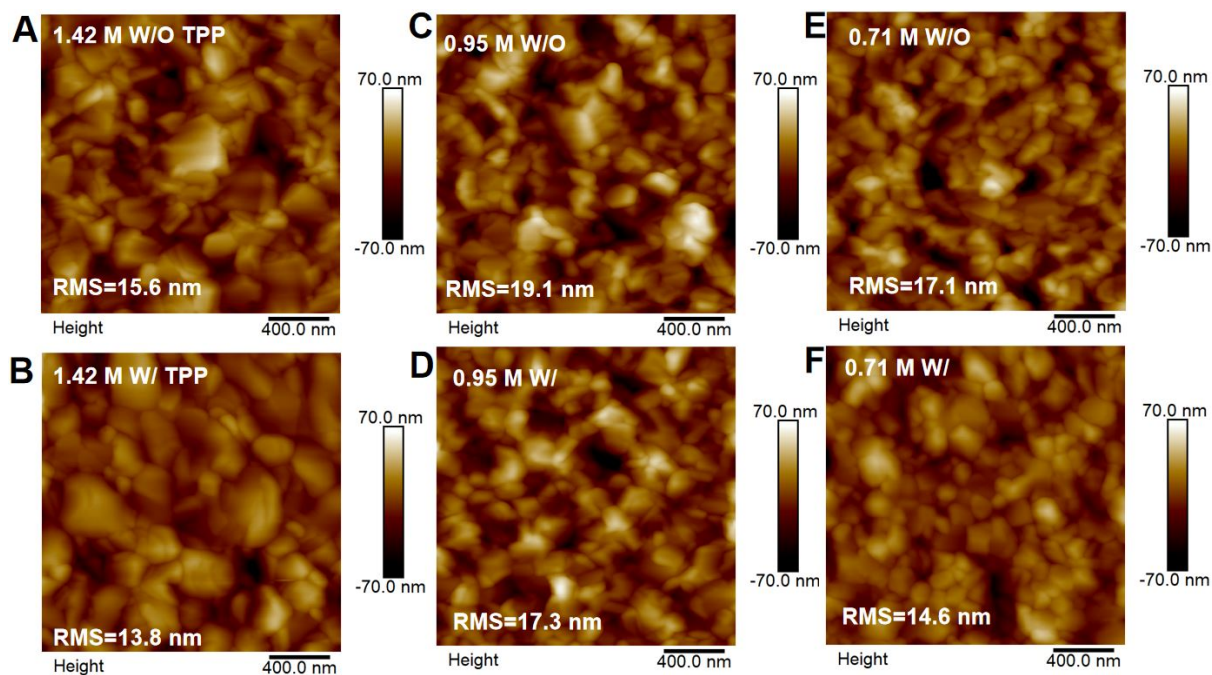

**Figure S7.** The morphology of the perovskite thin layers without and with the Lewis base treatments. The results showed a lower root-mean-square roughness after the Lewis base treatments.



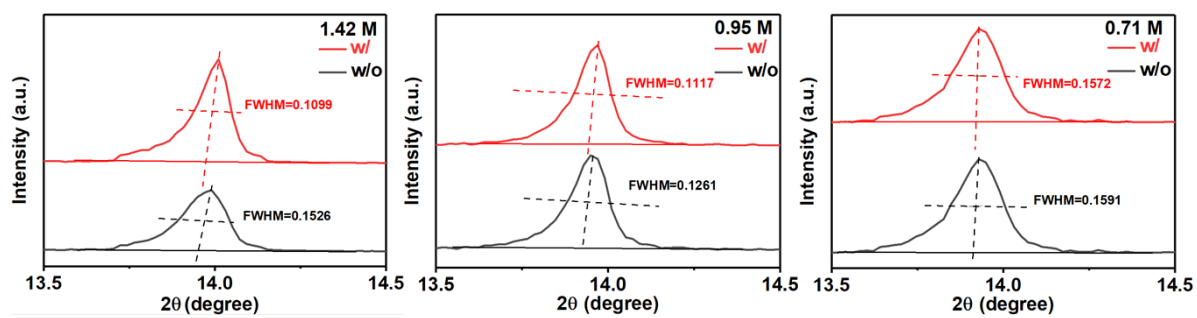

**Figure S8.** XRD spectra of the 1.42-, 0.95- and 0.71 M perovskite layers those showed the FWHM values of the (101) peaks.

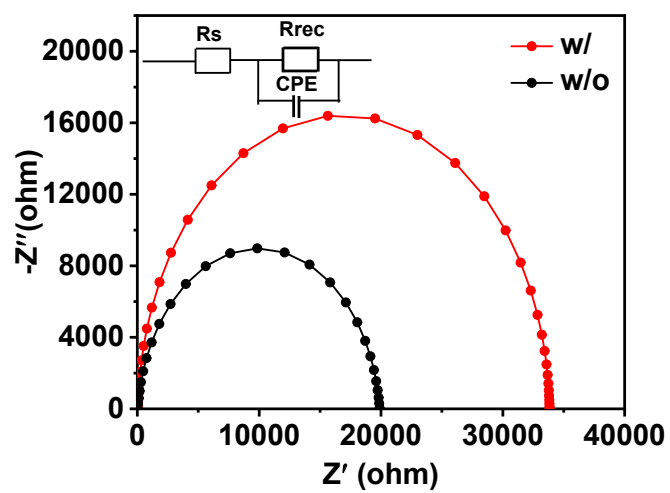

**Figure S9.** Nyquist plots under dark of the semitransparent PSCs without and with the TPP modifications.

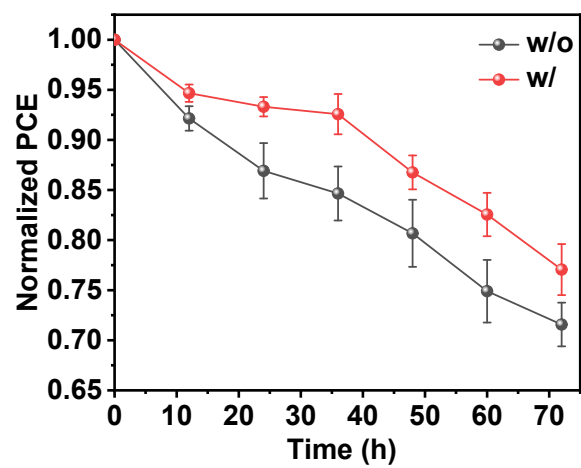

**Figure S10.** Air stability of the semitransparent PSCs without and with the TPP modifications.

**Table S1.** Photovoltaic performances of the three kinds of the semitransparent PSCs without (a) and with (b) the TPP treatments, respectively.

| Concentration | Scanning              | $V_{OC}$ [V] | $J_{SC}$ [mA cm <sup>-2</sup> ] | FF [%] | PCE [%] | PCE <sub>ave</sub> [%] | AVT [%] | LUE [%] |
|---------------|-----------------------|--------------|---------------------------------|--------|---------|------------------------|---------|---------|
| 1.42 M        | Forward <sup>a</sup>  | 1.093        | 22.66                           | 76.90  | 19.06   | 18.54                  | 4.65    | 0.88    |
|               | Backward <sup>a</sup> | 1.095        | 22.84                           | 76.25  | 19.07   |                        | 4.65    | 0.88    |
|               | Forward <sup>b</sup>  | 1.120        | 22.68                           | 79.56  | 20.20   | 19.78                  | 4.93    | 0.99    |
|               | Backward <sup>b</sup> | 1.112        | 22.76                           | 79.89  | 20.22   |                        | 4.93    | 0.99    |
| 0.95 M        | Forward <sup>a</sup>  | 1.097        | 20.24                           | 76.26  | 16.93   | 16.79                  | 13.51   | 2.29    |
|               | Backward <sup>a</sup> | 1.099        | 20.26                           | 76.47  | 17.02   |                        | 13.51   | 2.30    |
|               | Forward <sup>b</sup>  | 1.123        | 20.64                           | 77.94  | 18.07   | 17.89                  | 14.38   | 2.60    |
|               | Backward <sup>b</sup> | 1.118        | 20.73                           | 79.03  | 18.32   |                        | 14.38   | 2.63    |
| 0.71 M        | Forward <sup>a</sup>  | 1.024        | 17.79                           | 74.03  | 13.49   | 13.20                  | 24.38   | 3.29    |
|               | Backward <sup>a</sup> | 1.024        | 17.83                           | 74.25  | 13.56   |                        | 24.38   | 3.31    |
|               | Forward <sup>b</sup>  | 1.039        | 18.04                           | 79.94  | 14.98   | 14.71                  | 25.65   | 3.84    |
|               | Backward <sup>b</sup> | 1.043        | 18.02                           | 79.75  | 15.00   |                        | 25.65   | 3.85    |

**Table S2.** Comparisons of the PCE, AVT and LUE values of all the semitransparent PSCs.

| Device structure                                                                                                                                                                                                               | Top electrode                            | PCE [%]      | AVT [%]      | LUE [%]     | Ref.        |
|--------------------------------------------------------------------------------------------------------------------------------------------------------------------------------------------------------------------------------|------------------------------------------|--------------|--------------|-------------|-------------|
| ITO/MeO2PACZ/Cs <sub>0.05</sub> (FA <sub>0.98</sub> MA <sub>0.02</sub> ) <sub>0.95</sub> Pb(I <sub>0.98</sub> Br <sub>0.02</sub> ) <sub>3</sub> /PCBM @TPP/BCP/Ag/CBP                                                          | Ag/CBP                                   | <b>20.22</b> | 4.93         | <b>1.00</b> | <b>Here</b> |
| FTO/TiO <sub>2</sub> /CH <sub>3</sub> NH <sub>3</sub> PbI <sub>3-x</sub> Cl/spiro-MeOTAD/MoO <sub>x</sub> /Au-seed/Cu/MoO <sub>x</sub>                                                                                         | MoO <sub>x</sub> /Au/Cu/MoO <sub>x</sub> | <b>12.50</b> | 5.00         | <b>0.63</b> | 4           |
| ITO/MeO2PACZ/Cs <sub>0.05</sub> (FA <sub>0.98</sub> MA <sub>0.02</sub> ) <sub>0.95</sub> Pb(I <sub>0.98</sub> Br <sub>0.02</sub> ) <sub>3</sub> /PCBM @TPP/BCP/Ag/CBP                                                          | Ag/CBP                                   | <b>18.32</b> | 14.38        | <b>2.63</b> | <b>Here</b> |
| ITO/SnO <sub>2</sub> /Cs <sub>0.1</sub> MA <sub>0.15</sub> FA <sub>0.75</sub> PbI <sub>2.49</sub> Br <sub>0.51</sub> /spiro-MeOTAD/MoO <sub>x</sub> /Cu/Ag                                                                     | MoO <sub>x</sub> /Cu/Ag/MoO <sub>x</sub> | <b>13.44</b> | 8.67         | <b>1.17</b> | 2           |
| FTO/SnO <sub>2</sub> /C <sub>60</sub> -SAM/Cs <sub>0.05</sub> (FA <sub>0.85</sub> MA <sub>0.15</sub> ) <sub>0.95</sub> Pb(I <sub>0.85</sub> Br <sub>0.15</sub> ) <sub>3</sub> /poly-VNPB/MoO <sub>x</sub> /Au/MoO <sub>x</sub> | MoO <sub>x</sub> /Au/MoO <sub>x</sub>    | <b>16.1</b>  | 10.1         | <b>1.61</b> | 3           |
| FTO/ZnTiO <sub>3</sub> /FAMAPb(I <sub>Br</sub> ) <sub>3</sub> /QDs/NiO <sub>x</sub> /Au                                                                                                                                        | Au                                       | <b>14.25</b> | 14.50        | <b>2.07</b> | 5           |
| FTO/TiO <sub>2</sub> /MAPbI <sub>3-x</sub> Br <sub>x</sub> /Spiro-OMeTAD/Au                                                                                                                                                    | Au                                       | <b>18.27</b> | 10.00        | <b>1.83</b> | 9           |
| ITO/SnO <sub>2</sub> /CsFAMA/spiro-MeOTAD/MoO <sub>x</sub> /Ag/WO <sub>x</sub>                                                                                                                                                 | MoO <sub>x</sub> /Ag/WO <sub>x</sub>     | <b>15.40</b> | 10.17        | <b>1.57</b> | 15          |
| ITO/SnO <sub>2</sub> /FAPbI <sub>3</sub> /spiro-OMeTAD/MoO <sub>3</sub> /Ag/WO <sub>3</sub>                                                                                                                                    | MoO <sub>3</sub> /Ag/WO <sub>3</sub>     | <b>15.33</b> | 12.18        | <b>1.87</b> | 16          |
| ITO/SnO <sub>2</sub> /FA <sub>0.5</sub> MA <sub>0.38</sub> Cs <sub>0.12</sub> PbI <sub>2.04</sub> Br <sub>0.96</sub> /spiro-OMeTAD/MoO <sub>3</sub> /Ag/WO <sub>3</sub>                                                        | MoO <sub>3</sub> /Ag/WO <sub>3</sub>     | <b>13.16</b> | 16.55        | <b>2.18</b> | 16          |
| ITO/SnO <sub>2</sub> /FA <sub>0.5</sub> MA <sub>0.38</sub> Cs <sub>0.12</sub> PbI <sub>2.04</sub> Br <sub>0.96</sub> /spiro-OMeTAD/MoO <sub>3</sub> /Ag/WO <sub>3</sub>                                                        | MoO <sub>3</sub> /Ag/WO <sub>3</sub>     | <b>14.94</b> | 14.54        | <b>2.17</b> | 16          |
| ITO/MeO2PACZ/Cs <sub>0.05</sub> (FA <sub>0.98</sub> MA <sub>0.02</sub> ) <sub>0.95</sub> Pb(I <sub>0.98</sub> Br <sub>0.02</sub> ) <sub>3</sub> /PCBM @TPP/BCP/Ag/CBP                                                          | Ag/CBP                                   | <b>15.00</b> | <b>25.65</b> | <b>3.85</b> | <b>Here</b> |
| FTO/SnO <sub>2</sub> /Cs <sub>0.05</sub> (MA <sub>0.17</sub> FA <sub>0.83</sub> ) <sub>0.95</sub> Pb(I <sub>0.83</sub> Br <sub>0.17</sub> ) <sub>3</sub> /spiro-OMeTAD/Au NRs+TOAB                                             | Au NRs+TOAB                              | <b>13.70</b> | 27.00        | <b>3.70</b> | 1           |
| ITO/P3CT-N/CsPbI <sub>2</sub> Br/PCBM/C <sub>60</sub> /BCP/Ag/MoO <sub>x</sub>                                                                                                                                                 | Ag/MoO <sub>x</sub>                      | <b>11.04</b> | 21.19        | <b>2.30</b> | 6           |
| ITO/PTAA/MAPbI <sub>3</sub> -HEC/PCBM/BCP/Au                                                                                                                                                                                   | Au                                       | <b>11.60</b> | 20.69        | <b>2.4</b>  | 7           |
| ITO/PTAA/CH <sub>3</sub> NH <sub>3</sub> (I <sub>0.75</sub> Br <sub>0.15</sub> ) <sub>3</sub> /PCBM/BCP/Ag/MoO <sub>x</sub>                                                                                                    | Ag/MoO <sub>x</sub>                      | <b>12.82</b> | 21.00        | <b>2.69</b> | 8           |
| ITO/PTAA/MAPbI <sub>3</sub> /PCBM-BCP/Al                                                                                                                                                                                       | Al                                       | <b>14.40</b> | 20.00        | <b>2.88</b> | 10          |
| ITO/NiO <sub>x</sub> /CH <sub>3</sub> NH <sub>3</sub> PbI <sub>3</sub> /polyethylenimine ethoxylated (PEIE)/Cu                                                                                                                 | Cu                                       | <b>11.95</b> | 20.00        | <b>2.39</b> | 11          |
| FTO/SnO <sub>2</sub> /KCsFAMA/Spiro-OMeTAD/rGO/AgNWs/rGO <sub>3</sub>                                                                                                                                                          | rGO/AgNWs/rGO <sub>3</sub>               | <b>14.69</b> | 20.11        | <b>3.25</b> | 12          |
| ITO/MPbI <sub>3</sub> /C <sub>60</sub> /BCP/Ag                                                                                                                                                                                 | Ag                                       | <b>10.30</b> | 22.00        | <b>2.27</b> | 13          |
| ITO/NiO <sub>x</sub> /CH <sub>3</sub> NH <sub>3</sub> PbI <sub>3</sub> /PCBM/Zr(acac) <sub>4</sub> /Ag/CsF                                                                                                                     | Ag/CsF                                   | <b>11.74</b> | 23.00        | <b>2.70</b> | 14          |

**Table S3.** The lifetimes of the control and modified perovskite/ITO samples.

|         | <b>A<sub>1</sub></b> | <b>τ<sub>1</sub> (ns)</b> | <b>A<sub>2</sub></b> | <b>τ<sub>2</sub> (ns)</b> | <b>τ<sub>a</sub> (ns)</b> |
|---------|----------------------|---------------------------|----------------------|---------------------------|---------------------------|
| control | 1271.03              | 5.90                      | 411.53               | 39.17                     | 28.60                     |
| TPP     | 1490.79              | 6.81                      | 532.60               | 42.33                     | 31.30                     |
